# Supplementary material for: Peripheral Immunophenotype in IgG4-Related Disease and Its Association with Clinical Phenotypes and Disease Activity
Source: MDPI journal article supplement (doi:10.3390/cells12040670), 2023-02-20
Supplement: s1 [file s1]

## Supplementary material.

| Supplementary Table S1. Antibody information |            |             |                |
|----------------------------------------------|------------|-------------|----------------|
| Antibody                                     | Clone      | Catalog no. |                |
| anti-human CD4 PerCP                         | OKT4       | 317432      | BioLegend      |
| anti-human CD14 APC                          | M5E2       | 555397      | BD Biosciences |
| anti-human CD45 RO                           | UCHL1      | 304204      | BioLegend      |
| anti-human SLAMF7 APC                        | 162.1      | 331810      | BioLegend      |
| anti-human Bcl6 PeCy7                        | 7D1        | 358512      | BioLegend      |
| anti-human CXCR5 APC                         | J252D4     | 356908      | BioLegend      |
| anti-human CD127 PE                          | hIL-7R-M21 | 557938      | BioLegend      |
| anti-human ICOS FITC                         | C398.4A    | 313506      | BioLegend      |
| anti-human CD86 APC                          | IT2.2      | 305411      | BioLegend      |
| anti-human CD163 PerCP                       | GHI/61     | 333626      | BioLegend      |
| anti-human CD25 APC                          | BC96       | 302610      | BD Biosciences |
| anti-human CD86 FITC                         | 2331       | 557343      | BioLegend      |
| anti-human CD19 APC                          | HIB19      | 555415      | BD Biosciences |
| anti-human CD24 FITC                         | ML5        | 555427      | BD Biosciences |
| anti-human CD38 PerCP                        | HB-7       | 356622      | BioLegend      |
| anti-human IL-13 FITC                        | 85BRD      | 11-713642   | In vitrogen    |
| anti-human IL-4 PE                           | 8D4-8      | 559333      | BD Biosciences |
| anti-human IL-5 PE                           | JES1-39D10 | 559332      | BD Biosciences |
| anti-human IL-21 PE                          | 3A3-N2.1   | 560463      | BD Biosciences |
| anti-human IL-1 $\beta$ PE                   | JK1B-1     | 508206      | BioLegend      |
| anti-human TGF- $\beta$ 1 ALEXA Fluor 488    | 259D7C7    | 560047      | BD Biosciences |
| anti-human IFN- $\gamma$ PE                  | 4S.B3      | 559326      | BD Biosciences |
| anti-human Foxp3 PE                          | 259D/C7    | 560046      | BD Biosciences |
| anti-human Foxp3 ALEXA Fluor 488             | PCH101     | 73-5776-40  | e-Bioscience   |
| anti-human IL-9 PE                           | MH9A3      | 560807      | BD Biosciences |
| anti-human TNF- $\alpha$ FITC                | Mab11      | 502906      | BioLegend      |
| anti-human IL-33 PE                          | 390412     | IC3625P     | R&D            |
| anti-human IL-10 PE                          | JES3-19F1  | 559330      | BD Biosciences |
| anti-human IL-17A PE                         | SCPL1362   | 560436      | BD Biosciences |

| <b>Supplementary Table S2. Immunophenotype of the evaluated cell subsets.</b>          |                                                                                                                               |
|----------------------------------------------------------------------------------------|-------------------------------------------------------------------------------------------------------------------------------|
| <b>T helper 2 (Th2)</b>                                                                |                                                                                                                               |
|                                                                                        | CD4 <sup>+</sup> /CD14 <sup>-</sup> /IL-4 <sup>+</sup>                                                                        |
|                                                                                        | CD4 <sup>+</sup> /CD14 <sup>-</sup> /IL-13 <sup>+</sup>                                                                       |
|                                                                                        | CD4 <sup>+</sup> /CD14 <sup>-</sup> /IL-5 <sup>+</sup>                                                                        |
| <b>IL-21-producing CD4 T lymphocytes (TCD4 IL-21<sup>+</sup>)</b>                      |                                                                                                                               |
|                                                                                        | CD4 <sup>+</sup> /CD14 <sup>-</sup> /IL-21 <sup>+</sup>                                                                       |
| <b>T helper 9 (Th9)</b>                                                                |                                                                                                                               |
|                                                                                        | CD4 <sup>+</sup> /CD14 <sup>-</sup> /IL-9 <sup>+</sup>                                                                        |
| <b>CD4 cytotoxic T lymphocytes (CD4<sup>+</sup> CTLs)</b>                              |                                                                                                                               |
|                                                                                        | CD4 <sup>+</sup> /SLAMF7 <sup>+</sup> /IL-1β <sup>+</sup> /TGF-β1 <sup>+</sup>                                                |
| <b>T follicular helper (Tfh)</b>                                                       |                                                                                                                               |
|                                                                                        | Tfh17: CD4 <sup>+</sup> /ICOS <sup>+</sup> /CXCR5 <sup>+</sup> /Bcl6 <sup>+</sup> /IL-17 <sup>+</sup>                         |
|                                                                                        | Tfh2: CD4 <sup>+</sup> /ICOS <sup>+</sup> /CXCR5 <sup>+</sup> /Bcl6 <sup>+</sup> /IL-4 <sup>+</sup>                           |
|                                                                                        | Tfh1: CD4 <sup>+</sup> /ICOS <sup>+</sup> /CXCR5 <sup>+</sup> /Bcl6 <sup>+</sup> /IFN-γ <sup>+</sup>                          |
|                                                                                        | T follicular regulatory (Tfr): CD4 <sup>+</sup> /ICOS <sup>+</sup> /CXCR5 <sup>+</sup> /Bcl6 <sup>+</sup> /Foxp3 <sup>+</sup> |
| <b>Regulatory CD4 T cells</b>                                                          |                                                                                                                               |
|                                                                                        | T regulatory (Tregs): CD4 <sup>+</sup> /CD25 <sup>hi</sup> /CD127 <sup>-</sup> /Foxp3 <sup>+</sup>                            |
|                                                                                        | Type 1 regulatory T (Tr1): CD4 <sup>+</sup> /CD25 <sup>low</sup> /Foxp3 <sup>+</sup> /IL-10 <sup>+</sup>                      |
|                                                                                        | T helper 3 (Th3): CD4 <sup>+</sup> /CD25 <sup>-</sup> /Foxp3 <sup>-</sup> /TGF-β1 <sup>+</sup>                                |
| <b>IL-10-producing B cells (Bregs)</b>                                                 |                                                                                                                               |
|                                                                                        | CD19 <sup>+</sup> /CD24 <sup>hi</sup> /CD38 <sup>hi</sup> /IL-10 <sup>+</sup>                                                 |
| <b>IL-10-producing regulatory plasmacytoid dendritic cells (pDC IL-10<sup>+</sup>)</b> |                                                                                                                               |
|                                                                                        | CD86 <sup>-</sup> /CD163 <sup>hi</sup> /IL-10 <sup>+</sup>                                                                    |
| <b>M1 monocytes</b>                                                                    |                                                                                                                               |
|                                                                                        | CD86 <sup>+</sup> /CD127 <sup>+</sup> /TNF-α <sup>+</sup>                                                                     |
| <b>M2 monocytes</b>                                                                    |                                                                                                                               |
|                                                                                        | CD163 <sup>+</sup> /TGF-β1 <sup>+</sup> /IL-33 <sup>+</sup>                                                                   |

| Supplementary Table S3. Staining panel                           |               |               |                    |       |       |        |
|------------------------------------------------------------------|---------------|---------------|--------------------|-------|-------|--------|
|                                                                  | FITC          | PE            | Alexa<br>Fluor 488 | PerCP | PECy7 | APC    |
| Th2                                                              | IL-13         | IL-4          |                    | CD4   |       | CD14   |
| Th2                                                              |               | IL-5          |                    | CD4   |       | CD14   |
| Th9                                                              |               | IL-9          |                    | CD4   |       | CD14   |
| IL-21-producing CD4<br>T cells                                   |               | IL-21         |                    | CD4   |       | CD14   |
| CD4 cytotoxic T<br>lymphocytes                                   |               | IL-1 $\beta$  | TGF- $\beta$ 1     | CD4   |       | SLAMF7 |
| Tfh17                                                            | ICOS          | IL-17A        |                    |       | Bcl6  | CXCR5  |
| Tfh2                                                             | ICOS          | IL-4          |                    |       | Bcl6  | CXCR5  |
| Tfh1                                                             | ICOS          | IFN- $\gamma$ |                    |       | Bcl6  | CXCR5  |
| Tf regulatory                                                    | ICOS          | FoxP3         |                    |       | Bcl6  | CXCR5  |
| M1 monocytes                                                     | TNF- $\alpha$ | CD127         |                    |       |       | CD86   |
| M2 monocytes                                                     |               | IL-33         | TGF- $\beta$ 1     | CD163 |       | CD14   |
| Tregs                                                            |               | CD127         | FoxP3              | CD4   |       | CD25   |
| Tr1                                                              |               | IL-10         | FoxP3              | CD4   |       | CD25   |
| Th3                                                              |               | FoxP3         | TGF- $\beta$ 1     | CD4   |       | CD25   |
| Bregs                                                            | CD24          | IL-10         |                    | CD38  |       | CD19   |
| IL-10-producing<br>regulatory<br>plasmacytoid<br>dendritic cells | CD86          | IL-10         |                    | CD163 |       | CD14   |

**Supplementary Table S4. Immune cell subsets in proliferative and fibrotic phenotypes**

|                                                                                                             | <b>Proliferative<br/>(<i>n</i> = 33)</b> | <b>Fibrotic<br/>(<i>n</i> = 10)</b> | <b>p</b> |
|-------------------------------------------------------------------------------------------------------------|------------------------------------------|-------------------------------------|----------|
| CD4 <sup>+</sup> /CD14 <sup>+</sup> /IL-4 <sup>+</sup> (cell/μL)                                            | 289.9 (174.6-454.3)                      | 305.1 (106.5-598.5)                 | 0.94     |
| CD4 <sup>+</sup> /CD14 <sup>+</sup> /IL-13 <sup>+</sup> (cell/μL)                                           | 395.2 (257.6-550)                        | 451.7 (178.1-684)                   | 0.83     |
| CD4 <sup>+</sup> /CD14 <sup>+</sup> /IL-5 <sup>+</sup> (cell/μL)                                            | 378.8 (191.1-505)                        | 328 (237.9-448.2)                   | 0.62     |
| CD4 <sup>+</sup> /CD14 <sup>+</sup> /IL-21 <sup>+</sup> (cell/μL)                                           | 387.9 (274.6-695)                        | 359.1 (305.8-402.3)                 | 0.70     |
| CD4 <sup>+</sup> /CD14 <sup>+</sup> /IL-9 <sup>+</sup> (cell/μL)                                            | 417.7 (239.7-646.9)                      | 383.9 (248.9-549.9)                 | 0.45     |
| CD4 <sup>+</sup> /SLAMF7 <sup>+</sup> /IL-1β <sup>+</sup> /TGF-β1 <sup>+</sup> (cell/μL)                    | 1969.8 (1466.8-2354.6)                   | 1556.3 (1136.8-1807.3)              | 0.26     |
| Tfh (CD4 <sup>+</sup> /CXCR5 <sup>+</sup> /ICOS <sup>+</sup> /Bcl6 <sup>+</sup> ) (cell/μL)                 | 193.3 (113.2-346.8)                      | 170.2 (27.1-204.6)                  | 0.37     |
| Tfh1 (cell/μL)                                                                                              | 57.4 (24.7-83)                           | 40.6 (7.5-61.2)                     | 0.23     |
| Tfh2 (cell/μL)                                                                                              | 60.9 (28.8-83.1)                         | 39 (7.2-50.3)                       | 0.16     |
| Tfh17 (cell/μL)                                                                                             | 29.5 (16.1-79.2)                         | 51.9 (7.6-55.7)                     | 0.81     |
| Tfr (cell/μL)                                                                                               | 52.1 (31.4-85.3)                         | 34.7 (6.7-49.3)                     | 0.16     |
| CD4 <sup>+</sup> /CD127 <sup>+</sup> /CD25 <sup>hi</sup> /Foxp3 <sup>+</sup> (Tregs; cell/μL)               | 392.7 (264.5-481.8)                      | 316.8 (280.9-433.1)                 | 0.50     |
| CD4 <sup>+</sup> /CD25 <sup>low</sup> /Foxp3 <sup>+</sup> /IL-10 <sup>+</sup> (Tr1; cell/μL)                | 283.6 (169.3-360.2)                      | 356.9 (264.6-384.8)                 | 0.16     |
| CD4 <sup>+</sup> /CD25 <sup>+</sup> /Foxp3 <sup>+</sup> /TGF-β1 <sup>+</sup> (Th3; cell/μL)                 | 280.6 (221.7-371.2)                      | 245.6 (209.1-360.1)                 | 0.64     |
| CD19 <sup>+</sup> /CD24 <sup>hi</sup> /CD38 <sup>hi</sup> /IL-10 <sup>+</sup> (Bregs; cell/μL)              | 99.5 (62.5-130.3)                        | 81.4 (61.9-118.8)                   | 0.58     |
| CD86 <sup>+</sup> /CD163 <sup>hi</sup> /IL-10 <sup>+</sup> (pDC; cell/μL)                                   | 78.1 (58.5-116.5)                        | 79.6 (60.3-114.5)                   | 0.85     |
| CD163 <sup>+</sup> /TGF-β1 <sup>+</sup> /IL-33 <sup>+</sup> (M2 Monocytes; cell/μL)                         | 61.3 (53.8-86.1)                         | 66.9 (53.1-86.1)                    | 0.89     |
| CD86 <sup>+</sup> /CD127 <sup>+</sup> /TNF-α <sup>+</sup> (M1 Monocytes; cell/μL)                           | 84.3 (55.4-138.6)                        | 106.4 (66.6-169.7)                  | 0.50     |
| Results are presented as medians of cells per microliter for each immune cell subset (interquartile range). |                                          |                                     |          |

**Supplementary Table S5. Immune cell subsets in active vs. inactive IgG4-related disease**

|                                                                                                               | <b>Active<br/>(n = 22)</b> | <b>Inactive<br/>(n = 21)</b> | <b>p</b> |
|---------------------------------------------------------------------------------------------------------------|----------------------------|------------------------------|----------|
| CD4 <sup>+</sup> /CD14 <sup>+</sup> /IL-4 <sup>+</sup> (cell/ $\mu$ L)                                        | 252.1 (102.9-454.3)        | 340.4 (217.7-537.2)          | 0.26     |
| CD4 <sup>+</sup> /CD14 <sup>+</sup> /IL-13 <sup>+</sup> (cell/ $\mu$ L)                                       | 447.4 (244.8-649)          | 395.1 (257.6-539.6)          | 0.56     |
| CD4 <sup>+</sup> /CD14 <sup>+</sup> /IL-5 <sup>+</sup> (cell/ $\mu$ L)                                        | 328 (141.4-532)            | 378.8 (227.5-461.1)          | 0.86     |
| CD4 <sup>+</sup> /CD14 <sup>+</sup> /IL-21 <sup>+</sup> (cell/ $\mu$ L)                                       | 347.8 (274.6-635.1)        | 387.9 (330.6-695)            | 0.61     |
| CD4 <sup>+</sup> /CD14 <sup>+</sup> /IL-9 <sup>+</sup> (cell/ $\mu$ L)                                        | 369.6 (239.7-614.5)        | 465.3 (358.3-646.9)          | 0.56     |
| CD4 <sup>+</sup> /SLAMF7 <sup>+</sup> /IL-1 $\beta$ <sup>+</sup> /TGF- $\beta$ 1 <sup>+</sup> (cell/ $\mu$ L) | 1790.6 (1456-2901.6)       | 1774.8 (1118.3-2077)         | 0.25     |
| Tfh (CD4 <sup>+</sup> /CXCR5 <sup>+</sup> /ICOS <sup>+</sup> /Bcl6 <sup>+</sup> ) (cell/ $\mu$ L)             | 274.4 (146.3-370.8)        | 169.6 (112.9-209.9)          | 0.18     |
| Tfh1 (cell/ $\mu$ L)                                                                                          | 59.9 (23.6-84.9)           | 51.1 (19.6-61.6)             | 0.46     |
| Tfh2 (cell/ $\mu$ L)                                                                                          | 65.5 (35.1-113.2)          | 39.2 (24.9-68.1)             | 0.13     |
| Tfh17 (cell/ $\mu$ L)                                                                                         | 58.2 (21.8-119.9)          | 24.8 (14.3-44.2)             | 0.03     |
| Tfr (cell/ $\mu$ L)                                                                                           | 68.6 (29.7-101.5)          | 45.4 (30.1-55.9)             | 0.30     |
| CD4 <sup>+</sup> /CD127 <sup>+</sup> /CD25 <sup>hi</sup> /Foxp3 <sup>+</sup> (Tregs; cell/ $\mu$ L)           | 373.6 (262.6-488.8)        | 333.8 (299.2-448.5)          | 0.66     |
| CD4 <sup>+</sup> /CD25 <sup>low</sup> /Foxp3 <sup>+</sup> /IL-10 <sup>+</sup> (Tr1; cell/ $\mu$ L)            | 363.5 (292.2-488.8)        | 227.3 (153.6-283.6)          | <0.001   |
| CD4 <sup>+</sup> /CD25 <sup>+</sup> /Foxp3 <sup>+</sup> /TGF- $\beta$ 1 <sup>+</sup> (Th3; cell/ $\mu$ L)     | 297.8 (242.6-454.1)        | 244.8 (181.9-303.8)          | 0.02     |
| CD19 <sup>+</sup> /CD24 <sup>hi</sup> /CD38 <sup>hi</sup> /IL-10 <sup>+</sup> (Bregs; cell/ $\mu$ L)          | 92.3 (61.6-131)            | 95.2 (64.7-118.8)            | 0.62     |
| CD86 <sup>+</sup> /CD163 <sup>hi</sup> /IL-10 <sup>+</sup> (pDC; cell/ $\mu$ L)                               | 107.1 (74.2-128.6)         | 62.2 (53.5-81.8)             | 0.009    |
| CD163 <sup>+</sup> /TGF- $\beta$ 1 <sup>+</sup> /IL-33 <sup>+</sup> (M2 Monocytes; cell/ $\mu$ L)             | 76.9 (58.5-102.1)          | 58.7 (49-77.5)               | 0.04     |
| CD86 <sup>+</sup> /CD127 <sup>+</sup> /TNF- $\alpha$ <sup>+</sup> (M1 Monocytes; cell/ $\mu$ L)               | 116.8 (74.7-155.5)         | 77.2 (52.2-99.8)             | 0.02     |

Results are presented as medians of cells per microliter for each immune cell subset (interquartile range).

**Supplementary Table S6. Immune cell subsets in atopic vs. non-atopic IgG4-related disease**

|                                                                                                               | <b>Atopic<br/>(n = 11)</b> | <b>Non-atopic<br/>(n = 32)</b> | <b>p</b> |
|---------------------------------------------------------------------------------------------------------------|----------------------------|--------------------------------|----------|
| CD4 <sup>+</sup> /CD14 <sup>+</sup> /IL-4 <sup>+</sup> (cell/ $\mu$ L)                                        | 453.3 (276.8-774.5)        | 273.6 (108.7-352.4)            | 0.06     |
| CD4 <sup>+</sup> /CD14 <sup>+</sup> /IL-13 <sup>+</sup> (cell/ $\mu$ L)                                       | 480.4 (262.9-731.4)        | 388.8 (251.2-579.5)            | 0.50     |
| CD4 <sup>+</sup> /CD14 <sup>+</sup> /IL-5 <sup>+</sup> (cell/ $\mu$ L)                                        | 502.3 (296.5-630.4)        | 297.8 (188.7-451.8)            | 0.08     |
| CD4 <sup>+</sup> /CD14 <sup>+</sup> /IL-21 <sup>+</sup> (cell/ $\mu$ L)                                       | 549.9 (224.8-897.4)        | 372.9 (296.4-554.4)            | 0.61     |
| CD4 <sup>+</sup> /CD14 <sup>+</sup> /IL-9 <sup>+</sup> (cell/ $\mu$ L)                                        | 546.1 (259.7-729)          | 397.7 (244.3-569.3)            | 0.50     |
| CD4 <sup>+</sup> /SLAMF7 <sup>+</sup> /IL-1 $\beta$ <sup>+</sup> /TGF- $\beta$ 1 <sup>+</sup> (cell/ $\mu$ L) | 1771 (1610.3-2287)         | 1791 (1180.4-2307)             | 0.46     |
| Tfh (CD4 <sup>+</sup> /CXCR5 <sup>+</sup> /ICOS <sup>+</sup> /Bcl6 <sup>+</sup> ) (cell/ $\mu$ L)             | 126.5 (57.3-183.8)         | 207.3 (129.7-344)              | 0.11     |
| Tfh1 (cell/ $\mu$ L)                                                                                          | 44.7 (11.7-58)             | 59.7 (29.3-84)                 | 0.12     |
| Tfh2 (cell/ $\mu$ L)                                                                                          | 35.2 (20.1-44.8)           | 62.2 (32.3-82.9)               | 0.12     |
| Tfh17 (cell/ $\mu$ L)                                                                                         | 21.2 (7.7-40.2)            | 47.9 (20.7-79.9)               | 0.14     |
| Tfr (cell/ $\mu$ L)                                                                                           | 32.1 (14.6-44.3)           | 54 (32.3-93.4)                 | 0.04     |
| CD4 <sup>+</sup> /CD127 <sup>+</sup> /CD25 <sup>hi</sup> /Foxp3 <sup>+</sup> (Tregs; cell/ $\mu$ L)           | 392.7 (291.9-492.5)        | 342.8 (257-471.4)              | 0.63     |
| CD4 <sup>+</sup> /CD25 <sup>low</sup> /Foxp3 <sup>+</sup> /IL-10 <sup>+</sup> (Tr1; cell/ $\mu$ L)            | 359.6 (260.7-427.8)        | 272.7 (171.3-371.2)            | 0.24     |
| CD4 <sup>+</sup> /CD25 <sup>+</sup> /Foxp3 <sup>+</sup> /TGF- $\beta$ 1 <sup>+</sup> (Th3; cell/ $\mu$ L)     | 318.2 (241.2-392.3)        | 250.9 (219.5-347.2)            | 0.48     |
| CD19 <sup>+</sup> /CD24 <sup>hi</sup> /CD38 <sup>hi</sup> /IL-10 <sup>+</sup> (Bregs; cell/ $\mu$ L)          | 117.3 (75-127.5)           | 90 (61.7-127.6)                | 0.40     |
| CD86 <sup>+</sup> /CD163 <sup>hi</sup> /IL-10 <sup>+</sup> (pDC; cell/ $\mu$ L)                               | 81.8 (77.2-118.8)          | 75.5 (54.5-114.4)              | 0.38     |
| CD163 <sup>+</sup> /TGF- $\beta$ 1 <sup>+</sup> /IL-33 <sup>+</sup> (M2 Monocytes; cell/ $\mu$ L)             | 85.8 (68.3-97.8)           | 60 (52.8-89.7)                 | 0.08     |
| CD86 <sup>+</sup> /CD127 <sup>+</sup> /TNF- $\alpha$ <sup>+</sup> (M1 Monocytes; cell/ $\mu$ L)               | 99.8 (69.2-136.3)          | 86.9 (57.2-151)                | 1.00     |

Results are presented as medians of cells per microliter for each immune cell subset (interquartile range).

**Supplementary Table S7. Immune cell subsets in treated vs. untreated IgG4-related disease**

|                                                                                                               | <b>Treated<br/>(n = 27)</b> | <b>Untreated<br/>(n = 16)</b> | <b>p</b> |
|---------------------------------------------------------------------------------------------------------------|-----------------------------|-------------------------------|----------|
| CD4 <sup>+</sup> /CD14 <sup>-</sup> /IL-4 <sup>+</sup> (cell/ $\mu$ L)                                        | 308.3 (186.3-592.2)         | 255.7 (96.4-416.7)            | 0.30     |
| CD4 <sup>+</sup> /CD14 <sup>-</sup> /IL-13 <sup>+</sup> (cell/ $\mu$ L)                                       | 414.4 (271.6-741)           | 311.6 (211.4-519.5)           | 0.24     |
| CD4 <sup>+</sup> /CD14 <sup>-</sup> /IL-5 <sup>+</sup> (cell/ $\mu$ L)                                        | 363.7 (209.3-513.7)         | 306.4 (183.3-480.2)           | 0.86     |
| CD4 <sup>+</sup> /CD14 <sup>-</sup> /IL-21 <sup>+</sup> (cell/ $\mu$ L)                                       | 426.1 (301.2-739.7)         | 334.6 (257.4-395.1)           | 0.16     |
| CD4 <sup>+</sup> /CD14 <sup>-</sup> /IL-9 <sup>+</sup> (cell/ $\mu$ L)                                        | 465.3 (244.3-660.8)         | 389.9 (250.7-471.4)           | 0.54     |
| CD4 <sup>+</sup> /SLAMF7 <sup>+</sup> /IL-1 $\beta$ <sup>+</sup> /TGF- $\beta$ 1 <sup>+</sup> (cell/ $\mu$ L) | 2050 (1127.5-2718.6)        | 1720.1 (1453.2-1983.2)        | 0.42     |
| Tfh (CD4 <sup>+</sup> /CXCR5 <sup>+</sup> /ICOS <sup>+</sup> /Bcl6 <sup>+</sup> ) (cell/ $\mu$ L)             | 174.1 (77.7-325.5)          | 188.6 (149.3-344)             | 0.51     |
| Tfh1 (cell/ $\mu$ L)                                                                                          | 53.6 (18.4-76.5)            | 55.4 (39.5-75.1)              | 0.69     |
| Tfh2 (cell/ $\mu$ L)                                                                                          | 48.4 (23.8-72.9)            | 45.2 (35.7-83.4)              | 0.53     |
| Tfh17 (cell/ $\mu$ L)                                                                                         | 25.8 (11.5-68.2)            | 52.5 (26.6-77.8)              | 0.23     |
| Tfr (cell/ $\mu$ L)                                                                                           | 45.4 (22.3-76.9)            | 50.7 (32.4-85.1)              | 0.51     |
| CD4 <sup>+</sup> /CD127 <sup>-</sup> /CD25 <sup>hi</sup> /Foxp3 <sup>+</sup> (Tregs; cell/ $\mu$ L)           | 392.7 (293-481.3)           | 303.5 (267.2-461.5)           | 0.34     |
| CD4 <sup>+</sup> /CD25 <sup>low</sup> /Foxp3 <sup>-</sup> /IL-10 <sup>+</sup> (Tr1; cell/ $\mu$ L)            | 351 (219-417.3)             | 246.6 (189-313.5)             | 0.11     |
| CD4 <sup>+</sup> /CD25 <sup>-</sup> /Foxp3 <sup>-</sup> /TGF- $\beta$ 1 <sup>+</sup> (Th3; cell/ $\mu$ L)     | 276.5 (229.8-415.5)         | 266.6 (219.5-321.8)           | 0.56     |
| CD19 <sup>+</sup> /CD24 <sup>hi</sup> /CD38 <sup>hi</sup> /IL-10 <sup>+</sup> (Bregs; cell/ $\mu$ L)          | 95.2 (63.4-134.4)           | 93.1 (62-121.5)               | 0.70     |
| CD86 <sup>-</sup> /CD163 <sup>hi</sup> /IL-10 <sup>+</sup> (pDC; cell/ $\mu$ L)                               | 78 (55.9-115.5)             | 79.6 (60.8-117.8)             | 0.82     |
| CD163 <sup>+</sup> /TGF- $\beta$ 1 <sup>+</sup> /IL-33 <sup>+</sup> (M2 Monocytes; cell/ $\mu$ L)             | 77.5 (52.4-101.6)           | 59.4 (55.8-66.7)              | 0.16     |
| CD86 <sup>+</sup> /CD127 <sup>+</sup> /TNF- $\alpha$ <sup>+</sup> (M1 Monocytes; cell/ $\mu$ L)               | 91.5 (54.7-129.4)           | 88.8 (65.4-149.6)             | 0.66     |

Results are presented as medians of cells per microliter for each immune cell subset (interquartile range).

**Supplementary Table S8. Immune cell subsets in non-treated IgG4-related disease and healthy subjects**

|                                                                                                               | <b>Non-treated<br/>(n = 16)</b> | <b>Controls<br/>(n = 12)</b> | <b>p</b> |
|---------------------------------------------------------------------------------------------------------------|---------------------------------|------------------------------|----------|
| CD4 <sup>+</sup> /CD14 <sup>-</sup> /IL-4 <sup>+</sup> (cell/ $\mu$ L)                                        | 255.7 (96.3-416.6)              | 89.2 (66.3-111.9)            | 0.002    |
| CD4 <sup>+</sup> /CD14 <sup>-</sup> /IL-13 <sup>+</sup> (cell/ $\mu$ L)                                       | 311.6 (211.4-519.5)             | 89.4 (72.7-152.4)            | 0.001    |
| CD4 <sup>+</sup> /CD14 <sup>-</sup> /IL-5 <sup>+</sup> (cell/ $\mu$ L)                                        | 306.4 (183.3-480.2)             | 89.6 (65.3-105.4)            | <0.001   |
| CD4 <sup>+</sup> /CD14 <sup>-</sup> /IL-21 <sup>+</sup> (cell/ $\mu$ L)                                       | 334.6 (257.3-395)               | 131.8 (95.4-153)             | <0.001   |
| CD4 <sup>+</sup> /CD14 <sup>-</sup> /IL-9 <sup>+</sup> (cell/ $\mu$ L)                                        | 389.9 (250.7-471.4)             | 94 (64-217)                  | <0.001   |
| CD4 <sup>+</sup> /SLAMF7 <sup>+</sup> /IL-1 $\beta$ <sup>+</sup> /TGF- $\beta$ 1 <sup>+</sup> (cell/ $\mu$ L) | 1720 (1453.2-1983.2)            | 454.7 (398.6-630.8)          | <0.001   |
| Tfh (CD4 <sup>+</sup> /CXCR5 <sup>+</sup> /ICOS <sup>+</sup> /Bcl6 <sup>+</sup> ) (cell/ $\mu$ L)             | 188.7 (149.3-344)               | 20.6 (19.3-21.7)             | <0.001   |
| Tfh1 (cell/ $\mu$ L)                                                                                          | 55.4 (39.5-76.2)                | 5.6 (4.5-6.1)                | <0.001   |
| Tfh2 (cell/ $\mu$ L)                                                                                          | 45.2 (35.7-83.3)                | 4.8 (4.5-5.4)                | <0.001   |
| Tfh17 (cell/ $\mu$ L)                                                                                         | 52.5 (26.6-77.8)                | 4.6 (3.9-6)                  | <0.001   |
| Tfr (cell/ $\mu$ L)                                                                                           | 50.7 (32.4-85.1)                | 5.5 (5.3-6.2)                | <0.001   |
| CD4 <sup>+</sup> /CD127 <sup>-</sup> /CD25 <sup>hi</sup> /Foxp3 <sup>+</sup> (Tregs; cell/ $\mu$ L)           | 303.5 (267.2-461.5)             | 244.1 (158.7-291.5)          | 0.01     |
| CD4 <sup>+</sup> /CD25 <sup>low</sup> /Foxp3 <sup>+</sup> /IL-10 <sup>+</sup> (Tr1; cell/ $\mu$ L)            | 246.5 (189-313.5)               | 140.8 (80.4-192.2)           | 0.003    |
| CD4 <sup>+</sup> /CD25 <sup>+</sup> /Foxp3 <sup>+</sup> /TGF- $\beta$ 1 <sup>+</sup> (Th3; cell/ $\mu$ L)     | 266.6 (219.5-321.8)             | 98 (70.6-137)                | <0.001   |
| CD19 <sup>+</sup> /CD24 <sup>hi</sup> /CD38 <sup>hi</sup> /IL-10 <sup>+</sup> (Bregs; cell/ $\mu$ L)          | 93.2 (62-121.5)                 | 56.1 (44.4-70.9)             | 0.004    |
| CD86 <sup>-</sup> /CD163 <sup>hi</sup> /IL-10 <sup>+</sup> (pDC; cell/ $\mu$ L)                               | 79.6 (60.8-117.8)               | 63.1 (49.8-77.1)             | 0.04     |
| CD163 <sup>+</sup> /TGF- $\beta$ 1 <sup>+</sup> /IL-33 <sup>+</sup> (M2 Monocytes; cell/ $\mu$ L)             | 59.4 (55.8-66.7)                | 37.9 (29.8-49.3)             | <0.001   |
| CD86 <sup>+</sup> /CD127 <sup>+</sup> /TNF- $\alpha$ <sup>+</sup> (M1 Monocytes; cell/ $\mu$ L)               | 88.8 (65.4-149.7)               | 43.7 (39.8-49.5)             | <0.001   |
| Results are presented as medians of cells per microliter for each immune cell subset (interquartile range).   |                                 |                              |          |



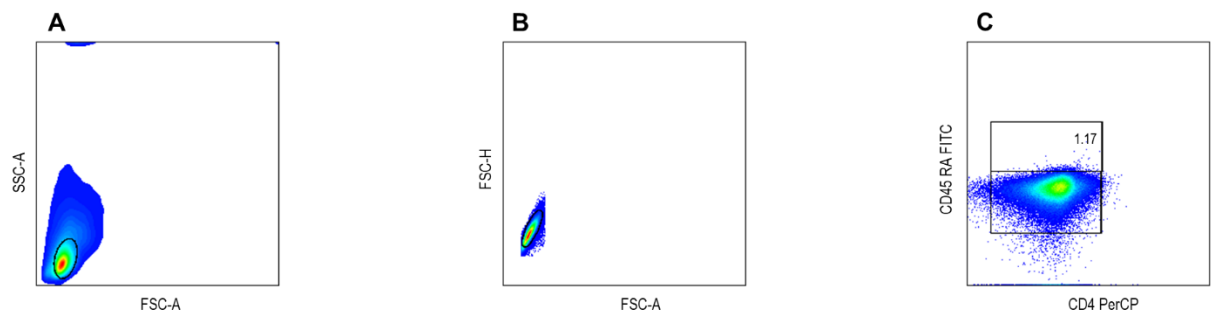

**Supplementary Figure S1.** Representative dot plot of the CD4<sup>+</sup>T memory cell isolation.

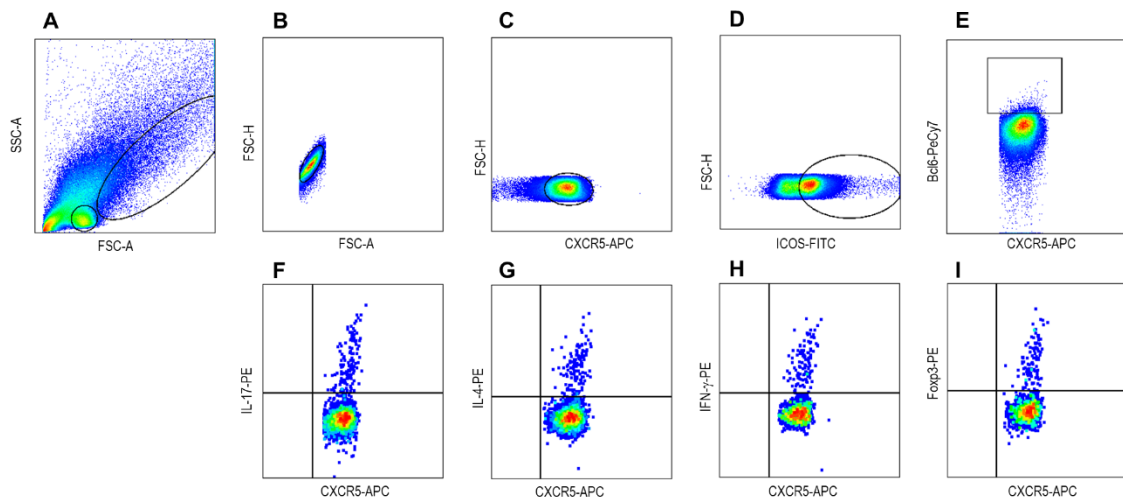

**Supplementary Figure S2.** Percentage of circulating Tfh cells in a patient with IgG4-related disease. (A) Representative plot from the lymphocyte subpopulation was gated. (B) An electronic gate was made for singlets. (C) From the latter an electronic gate was made for CXCR5+ cells. (D) From the gate CXCR5+/ICOS+ cells were determined. (E) From the gate CXCR5+/ICOS+/Bcl6+ cells were evaluated, and an electronic gate was made for triple-positive cells. (F) From the gate CXCR5+/ICOS+/Bcl6+/IL-17+ cells were determined. (G) From the gate CXCR5+/ICOS+/Bcl6+/IL-4+ cells were determined. (H) From the gate CXCR5+/ICOS+/Bcl6+/IFN- $\gamma$ + cells were determined. (I) From the gate CXCR5+/ICOS+/Bcl6+/Foxp3+ cells were selected.

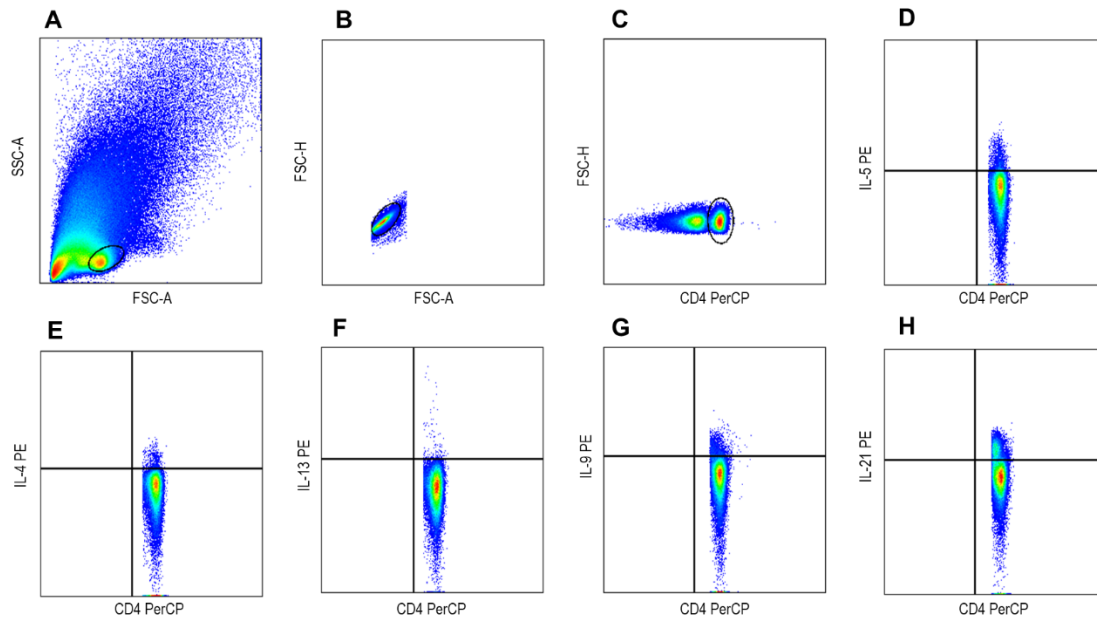

**Supplementary Figure S3.** Percentage of circulating CD4 effector T cells in a patient with IgG4-related disease. (A) Representative plot from the lymphocyte subpopulation was gated. (B) An electronic gate was made for singlets. (C) From the latter, an electronic gate was made for CD4+ cells. (D) From the gate of figure B, IL-5+ cells were determined. (E) From the gate of figure B, IL-4+ cells were evaluated. (F) From the gate of figure B, IL-13+ cells were determined. (G) From the gate of figure B, IL-9+ cells were determined. (H) From the gate of figure B, IL-21+ cells were determined.

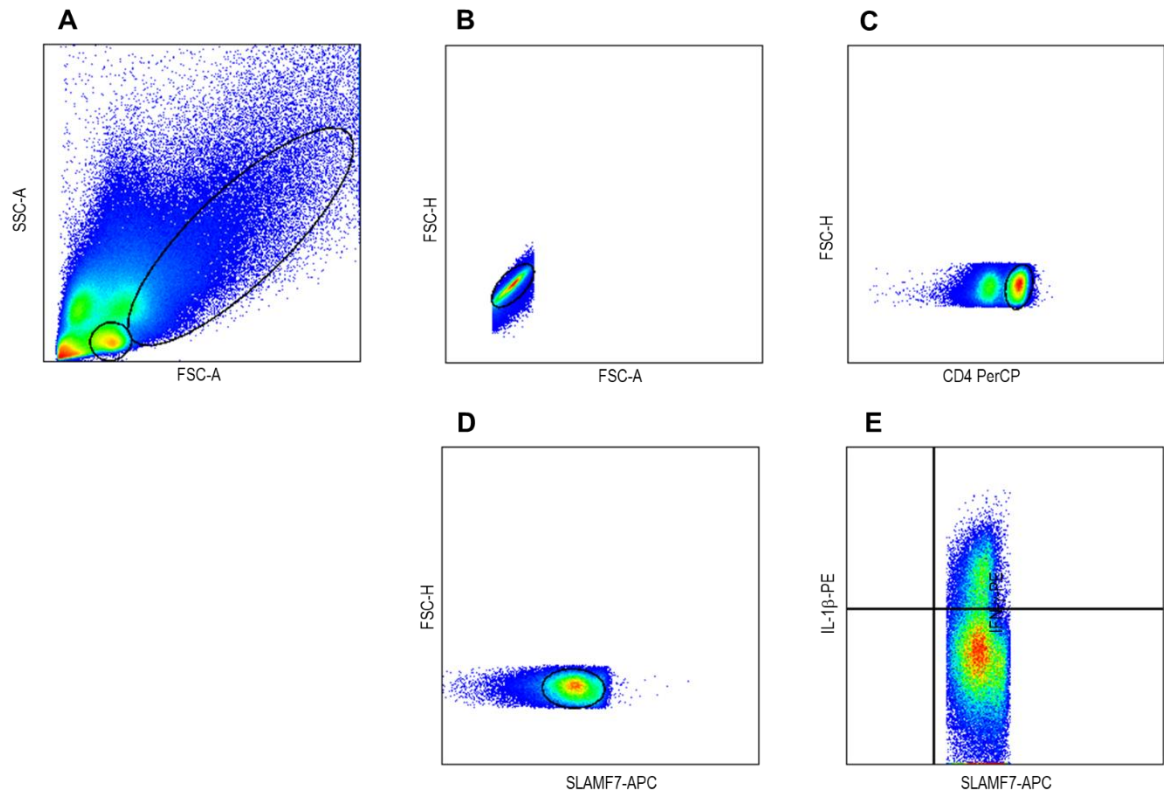

**Supplementary Figure S4.** Percentage of circulating CD4<sup>+</sup> cytotoxic T lymphocytes in a patient with IgG4-related disease. (A) Representative plot from the lymphocyte subpopulation was gated. (B) An electronic gate was made for singlets. (C) From the latter an electronic gate was made for CD4<sup>+</sup> cells. (D) From the gate of CD4<sup>+</sup> cells/SLAMF7<sup>+</sup> cells were determined. (E) From the gate of figure D, IL-β<sup>+</sup>/TGF-β1<sup>+</sup> cells were evaluated.

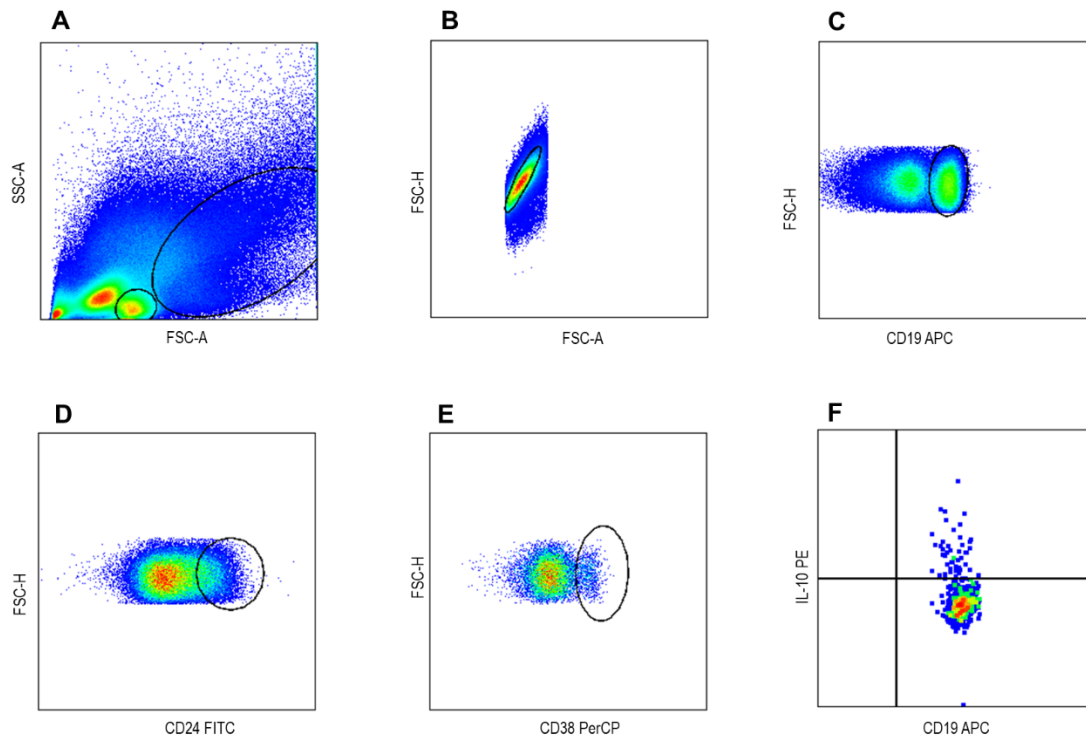

**Supplementary Figure S5.** Percentage of circulating IL-10-producing B cells in a patient with IgG4-related disease. (A) Representative plot from the lymphocyte subpopulation was gated. (B) An electronic gate was made for singlets. (C) From the latter, an electronic gate was made for CD19+ cells. (D) From the gate of CD19+ cells, CD24+ cells were determined. (E) From the gate of CD19+/CD24+ cells, CD38+ cells were evaluated. (F) From the gate of CD19+/CD24+/CD38+/IL-10+, cells were evaluated.
